# Supplementary material for: Rethinking Antimicrobial Resistance Surveillance: A Role for Lot Quality Assurance Sampling
Source: PubMed Central journal article supplement — Am J Epidemiol. 2019 Jan 4;188(4):734–42. doi: 10.1093/aje/kwy276 (PMC6438814; doi:10.1093/aje/kwy276), 2019-01-04
Supplement: kwy276_van_leth_web_material_final.pdf [file kwy276_van_leth_web_material_final.pdf]

## Web Material

### Rethinking Antimicrobial Resistance Surveillance:

#### A Role for Lot Quality Assurance Sampling

Franciscus Ginting\*, Adhi Kristianto Sugianli\*, Gidion Bijl, Restuti Hidayani Saragih, R. Lia Kusumawati, Ida Parwati, Menno D. de Jong, Constance Schultsz#, and Frank van Leth#

\* shared first author; # shared senior author

#### TABLE OF CONTENTS

|                                                                                                                                                                                                                                             |   |
|---------------------------------------------------------------------------------------------------------------------------------------------------------------------------------------------------------------------------------------------|---|
| <b>Web Table 1:</b> description of sites participating in conventional amr survey (april 2014 – may 2015) and lqas-based amr survey (september 2016 – june 2017) in medan and bandung, indonesia .....                                      | 2 |
| <b>Web Table 2:</b> definitions of suspected urinary tract infection to assess eligibility for conventional amr survey (april 2014 – may 2015) and lqas-based amr survey (september 2016 – june 2017) in medan and bandung, indonesia ..... | 3 |
| <b>Web Table 3:</b> item cost, sources and methodology used in cost study (may 2017) for lqas-based amr survey in two outpatient clinics in medan, indonesia.....                                                                           | 4 |
| <b>Web Table 4:</b> prevalence of resistance in conventional amr survey (april 2014 – may 2015) in medan and bandung, indonesia .....                                                                                                       | 5 |
| <b>Web Figure 1:</b> cost items for specified lqas process steps .....                                                                                                                                                                      | 6 |
| <b>Web Figure 2:</b> operating curves for identify draws classified as high prevalence of amr given true prevalence of amr in the population, for six lqas-definitions .....                                                                | 7 |

Web Table 1: Description of sites participating in conventional AMR survey (April 2014 – May 2015) and LQAS-based AMR survey (September 2016 – June 2017) in Medan and Bandung, Indonesia

| <b>Location</b> | <b>Name</b>            | <b>Setting</b>                                                         | <b>Description</b>                                                                                          |
|-----------------|------------------------|------------------------------------------------------------------------|-------------------------------------------------------------------------------------------------------------|
| Bandung         | Hasan Sadikin Hospital | Urology outpatient                                                     | Tertiary hospital for greater Bandung region and the west Java province. Public and private sector          |
|                 | Salamun hospital       | Urology outpatient                                                     | Secondary care public sector. Patients referred from primary health care centers Northern parts of Bandung. |
|                 | Cibabat hospital       | Urology outpatient                                                     | Secondary care public sector. Patients referred from primary health care centers Western parts of Bandung.  |
|                 | Kasih Bunda hospital   | OBGYN outpatient                                                       | Primary and secondary care private sector. Serves patients from Western district of Bandung                 |
| Medan           | Martha Friska hospital | Urology outpatient                                                     | Secondary care for private sector. West district of Medan city.                                             |
|                 | Zaman Kaban clinic     | OBGYN outpatient                                                       | Primary and secondary care for private sector                                                               |
|                 | Pelindo hospital       | Internal medicine outpatients                                          | Secondary care public sector in area of Belawan Harbour.                                                    |
|                 | Adam Malik hospital    | Internal Medicine ward<br>OBGYN ward<br>Neurology ward<br>Surgery ward | Tertiary hospital public sector. Referral hospital for Sumatra Island. 750 bed capacities                   |

OBGYN: obstetrics and gynaecology

Web Table 2: Definitions of suspected urinary tract infection to assess eligibility for conventional AMR survey (April 2014 – May 2015) and LQAS-based AMR survey (September 2016 – June 2017) in Medan and Bandung, Indonesia

| <b>Definition</b>      |                             | <b>Setting</b>                                              | <b>At least one of the following symptoms within last 7 days</b>                           |
|------------------------|-----------------------------|-------------------------------------------------------------|--------------------------------------------------------------------------------------------|
| Community-acquired UTI |                             |                                                             | urgency, frequency, dysuria, suprapubic tenderness, costovertebral pain                    |
| Hospital-acquired UTI  | No urinary catheter in-situ | Hospitalized for at least 48 hours                          | Urgency, frequency<br>Dysuria, acute hematuria, suprapubic tenderness, costovertebral pain |
|                        | Urinary catheter in-situ    | Having an indwelling urinary catheter for at least 48 hours | Acute hematuria, suprapubic tenderness, costovertebral pain, pyuria                        |
|                        | After removal of catheter   | Having a urinary catheter removed within the last 48 hours  | Urgency, frequency, dysuria, acute hematuria, suprapubic tenderness, costovertebral pain   |

UTI: Urinary Tract Infection

Web Table 3: item cost, sources and methodology used in cost study (May 2017) for LQAS-based AMR survey in two outpatient clinics in Medan, Indonesia

| Setting              | Category    | Activity / item                         | Quantity         | Source                                                     | Strategy                 |
|----------------------|-------------|-----------------------------------------|------------------|------------------------------------------------------------|--------------------------|
| Enrolment/assessment | Time        | Pre-consent                             | Nurse time       | Nurse salary, financial department                         | Bottom-up                |
|                      |             | Eligibility assessment                  | Nurse time       | Nurse salary, financial department                         | Bottom-up                |
|                      |             | Informed Consent                        | Nurse time       | Nurse salary, financial department                         | Bottom-up                |
|                      |             | Urine collection                        | Nurse time       | Nurse salary, financial department                         | Bottom-up                |
|                      |             | Urine Dipstick                          | Nurse time       | Nurse salary, financial department                         | Bottom-up                |
|                      |             | Administrative tasks                    | Nurse time       | Nurse salary, financial department                         | Top-down                 |
|                      |             | Fixed costs                             | Cool box         | Purchased amount                                           | Purchase price, receipts |
|                      | consumables | Refrigerator                            | Purchased amount | Purchase price, receipts                                   | Top-down                 |
|                      |             | Ice packs                               | Purchased amount | Purchase price, receipts                                   | Top-down                 |
|                      |             | Informed consent sheet                  | Purchased amount | Purchase price, receipts                                   | Top-down                 |
|                      |             | Bar code stickers                       | Purchased amount | Purchase price, receipts                                   | Top-down                 |
|                      |             | Information sheets                      | Purchased amount | Purchase price, receipts                                   | Top-down                 |
|                      |             | Sterile urine container                 | Amount used      | Purchase price, receipts                                   | Bottom-up                |
|                      |             | Gloves                                  | Amount used      | Purchase price, receipts                                   | Bottom-up                |
| Laboratory           | Time        | Preparation and storage short set       | Laboratory time, | Laboratory analyst salary, financial department, interview | Top-down                 |
|                      |             | Preparation and storage of agar plates  | Laboratory time, | Laboratory analyst salary, financial department, interview | Top-down                 |
|                      |             | Maintenance of freezer / fridge         | Laboratory time, | Laboratory analyst salary, financial department, interview | Top-down                 |
|                      |             | Quality control of Agar                 | Laboratory time, | Laboratory analyst salary, financial department, interview | Top-down                 |
|                      |             | Quality control of Short set            | Laboratory time, | Laboratory analyst salary, financial department, interview | Top-down                 |
|                      |             | Manual analysis of plates               | Laboratory time, | Laboratory analyst salary, financial department, interview | Bottom-up                |
|                      |             | Urine Cultures                          | Laboratory time, | Laboratory analyst salary, financial department, interview | Bottom-up                |
|                      |             | Identification of bacteria in short set | Laboratory time, | Laboratory analyst salary, financial department, interview | Bottom-up                |
|                      | Fixed costs | Freezer                                 | Purchased amount | Purchase price, receipts                                   | Top-down                 |
|                      |             | Fridge                                  | Purchased amount | Purchase price, receipts                                   | Top-down                 |
|                      |             | Ice pack                                | Purchased amount | Purchase price, receipts                                   | Top-down                 |
|                      | Consumables | Gloves                                  | Amount used      | Purchase price, receipts                                   | Bottom-up                |
|                      |             | Petri Dishes                            | Amount used      | Purchase price, receipts                                   | Bottom-up                |
|                      |             | Pipettes                                | Amount used      | Purchase price, receipts                                   | Bottom-up                |
|                      |             | Combur 10 Dipstick                      | Amount used      | Purchase price, receipts                                   | Bottom-up                |
|                      |             | Agar plates                             | Amount prepared  | Price of materials and preparation costs, receipts         | Bottom-up                |
|                      |             | Calibrated loop                         | Amount used      | Purchase price, receipts                                   | Bottom-up                |
|                      |             | Forms                                   | Purchased amount | Purchase price, receipts                                   | Bottom-up                |
|                      |             | Glass foil                              | Purchased amount | Purchase price, receipts                                   | Top-down                 |
|                      |             | Cryotubes                               | Amount used      | Purchase price, receipts                                   | Bottom-up                |
|                      |             | Short set reagents                      | Amount prepared  | Price of materials and preparation costs, receipts         | Bottom-up                |

Web Table 4: Prevalence of resistance in conventional AMR survey (April 2014 – May 2015) in Medan and Bandung, Indonesia

| Antibiotic     | tested | Resistant |      |            |
|----------------|--------|-----------|------|------------|
|                | n      | n         | %    | 95% CI     |
| Amikacin       | 336    | 27        | 8.0  | 5.1, 10.9  |
| Ampicillin     | 280    | 239       | 85.4 | 81.2, 89.5 |
| Ciprofloxacin  | 336    | 223       | 66.4 | 61.3, 71.4 |
| Gentamycin     | 336    | 106       | 31.5 | 22.6, 36.5 |
| Ceftriaxone    | 336    | 192       | 57.1 | 51.8, 62.4 |
| Cefuroxime     | 336    | 233       | 69.3 | 64.4, 74.3 |
| Ertapenem      | 336    | 32        | 9.5  | 6.4, 12.7  |
| Nitrofurantoin | 336    | 81        | 24.1 | 19.5, 28.7 |
| Cefepime       | 336    | 159       | 47.3 | 42.0, 52.7 |
| Fosfomycin     | 292    | 7         | 2.4  | 0.6, 4.2   |
| Levofloxacin   | 336    | 210       | 62.5 | 57.3, 67.7 |
| Meropenem      | 336    | 12        | 3.6  | 1.6, 5.6   |
| Tigecycline    | 252    | 17        | 6.7  | 3.6, 9.8   |

CI: Confidence Interval

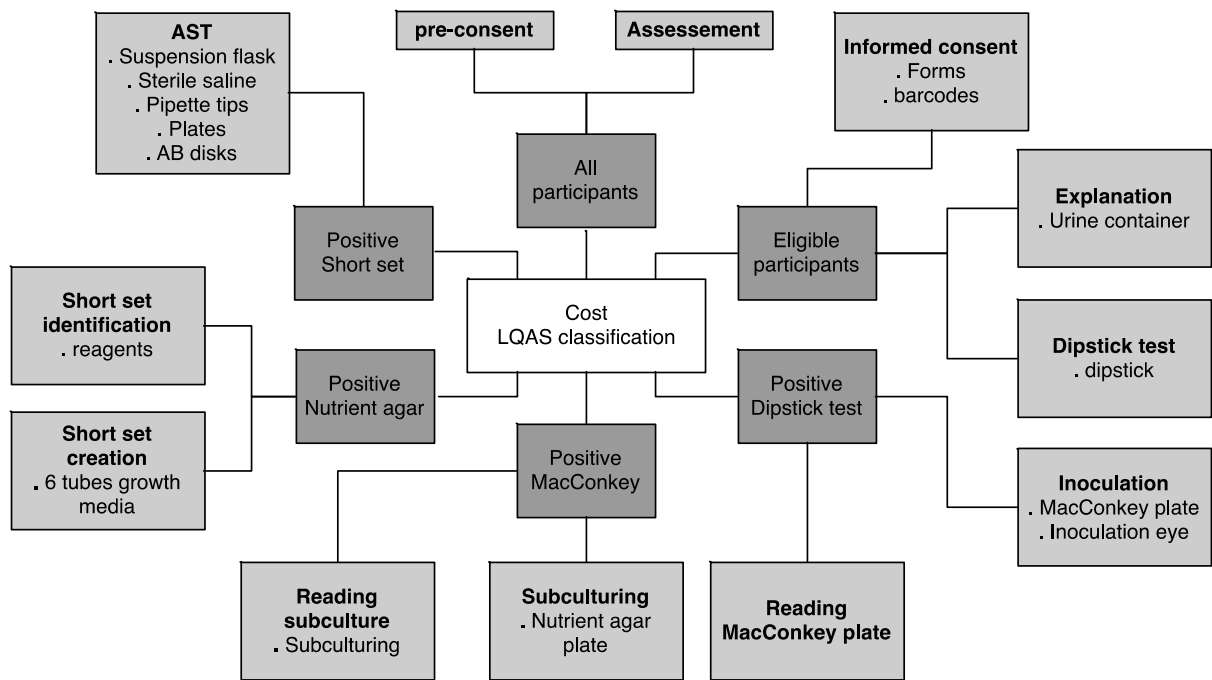

Web Figure 1: cost items for specified LQAS process steps

All cost items are combined together in a single cost for obtaining an LQAS-classification for 15 antibiotics for a single site. The figure depicts the populations for which the cost is estimated (dark gray), and the activities with key line items performed for these populations (light gray)

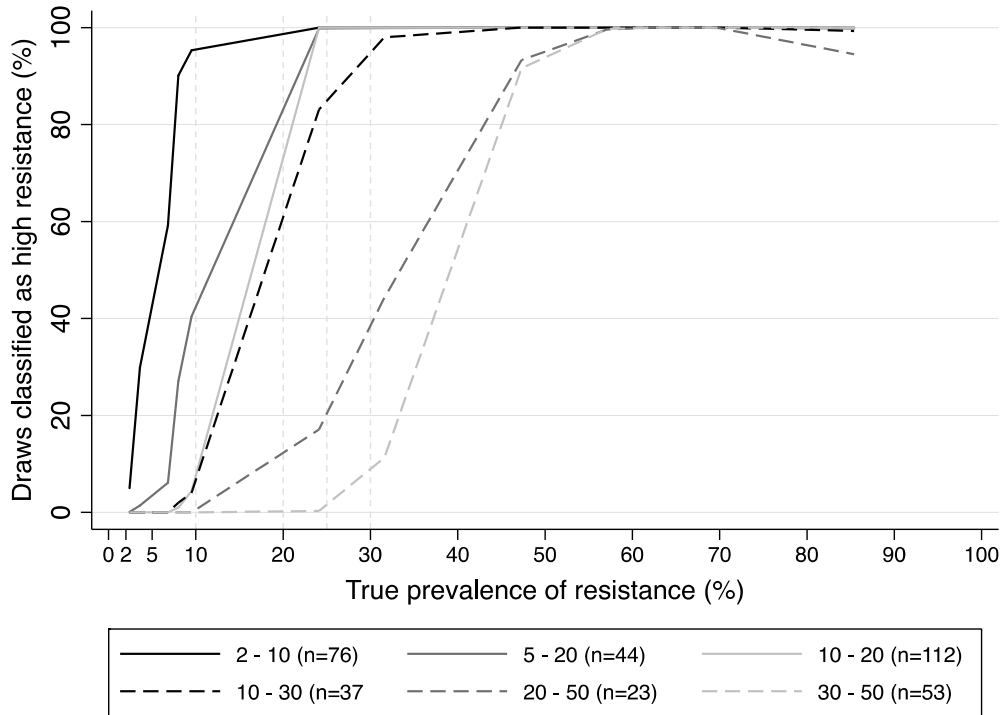

Web Figure 2: Operating curves for identify draws classified as high prevalence of AMR given true prevalence of AMR in the population, for six LQAS-definitions
